# Supplementary material
Source: Springer Nature journal article supplement (https://www.springermedizin.de/resource/supplementary/13000_2012_686_MOESM2_ESM.pdf/9624872)
Supplement: MOESM2 [file 9624872]

# 【84：皮膚】

【性別】

女性

【年齢】

28

【臨床診断】

Dermatofibroma ?

【備考】

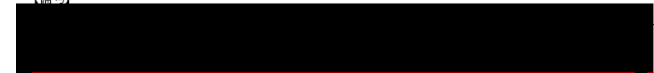

a

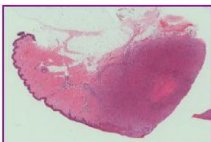

画像をクリックするとパー・チャル・スラ・ボが展開されます。

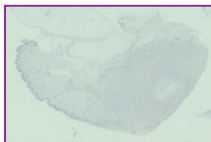

画像をクリックするとパー・チャル・スラ・ボが展開されます。

b

|      |                  |
|------|------------------|
| 部位   | 皮膚               |
| 性別   | 女性               |
| 年齢   | 28               |
| 臨床診断 | Dermatofibroma ? |
| 備考   | text             |

c

|                        |                                                                                                  |
|------------------------|--------------------------------------------------------------------------------------------------|
| Virtual Slide 1 のファイル名 | 5124<br>パー・チャル・スラ・ボ1のファイル名(拡張子を除く)を入力してください。(例:「0888.svg」というファイル名ならば「0888」と入力する)                 |
| Virtual Slide 2 のファイル名 | 5125<br>パー・チャル・スラ・ボ2のファイル名(拡張子を除く)を入力してください。(例:「0888.svg」というファイル名ならば「0888」と入力する)                 |
| Virtual Slide 3 のファイル名 | <input type="text"/><br>パー・チャル・スラ・ボ3のファイル名(拡張子を除く)を入力してください。(例:「0888.svg」というファイル名ならば「0888」と入力する) |
| Virtual Slide 4 のファイル名 | <input type="text"/><br>パー・チャル・スラ・ボ4のファイル名(拡張子を除く)を入力してください。(例:「0888.svg」というファイル名ならば「0888」と入力する) |
| Virtual Slide 5 のファイル名 | <input type="text"/><br>パー・チャル・スラ・ボ5のファイル名(拡張子を除く)を入力してください。(例:「0888.svg」というファイル名ならば「0888」と入力する) |

d

|       |                                                                                                                                         |  |
|-------|-----------------------------------------------------------------------------------------------------------------------------------------|--|
| 添付画像1 | <input type="text"/> <input type="button" value="参照..."/><br><small>画像を送付する場合はファイルを選択してください。<br/>(※10MBまでのJPEGファイルをアップロードできます。)</small> |  |
| 添付画像2 | <input type="text"/> <input type="button" value="参照..."/><br><small>画像を送付する場合はファイルを選択してください。<br/>(※10MBまでのJPEGファイルをアップロードできます。)</small> |  |
| 添付画像3 | <input type="text"/> <input type="button" value="参照..."/><br><small>画像を送付する場合はファイルを選択してください。</small>                                    |  |

e

|           |                |
|-----------|----------------|
| 依頼先ドクター1  | ---- 選択なし ---- |
| 依頼先ドクター2  | ---- 選択なし ---- |
| 依頼先ドクター3  | ---- 選択なし ---- |
| 依頼先ドクター4  | ---- 選択なし ---- |
| 依頼先ドクター5  | ---- 選択なし ---- |
| 依頼先ドクター6  | ---- 選択なし ---- |
| 依頼先ドクター7  | ---- 選択なし ---- |
| 依頼先ドクター8  | ---- 選択なし ---- |
| 依頼先ドクター9  | ---- 選択なし ---- |
| 依頼先ドクター10 | ---- 選択なし ---- |
